# Supplementary material for: PorinPredict: In Silico Identification of OprD Loss from WGS Data for Improved Genotype-Phenotype Predictions of P. aeruginosa Carbapenem Resistance
Source: PubMed Central journal article supplement (PMC10100854; doi:10.1128/spectrum.03588-22), 2023-01-30
Supplement: spectrum.03588-22-s0002.pdf [file spectrum.03588-22-s0002.pdf]

## Supplementary Materials

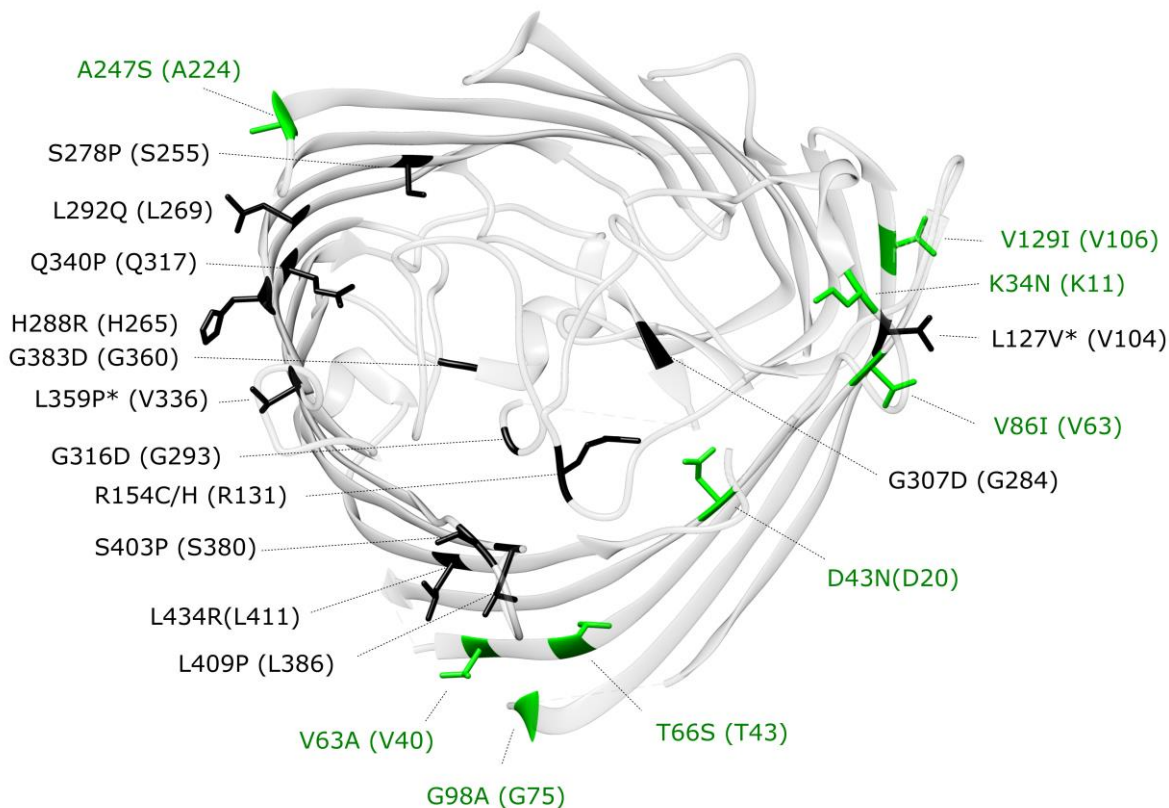

**Supplementary Figure 1. Schematic structure of OprD (PDB accession [3SY7](#)).** Sites of amino acid substitutions identified in susceptible (green) or non-susceptible (black) carbapenemase-negative isolates of the validation dataset are labelled. Amino acid numbering refers to an L8<sub>10</sub> type OprD. Numbering without the 23 amino acid signal sequence is given in brackets. In the labelled mutations, wild-type amino acids refer to those of the closest OprD variant in the reference database and may differ from the [3SY7](#) sequence (asterisk). The image was created using UCSF Chimera software version 1.16 (1).

## References

1. Pettersen EF, Goddard TD, Huang CC, Couch GS, Greenblatt DM, Meng EC, Ferrin TE. 2004. UCSF Chimera - a visualization system for exploratory research and analysis. *J Comput Chem* 25:1605–12.
